# Supplementary material for: Solvent-Free Oxidation of Benzyl Alcohol Derivatives by In Situ Generated Redox Couple Pd(0)/PdOx Supported on Ceria Nanorods
Source: MDPI journal article supplement (doi:10.3390/catal13010005), 2022-12-21
Supplement: s1 [file s1]

Archive with 1 entries (1 files):
- catalysts-2068526-supplementary.pdf
