# Supplementary material for: Solvent-Free Oxidation of Benzyl Alcohol Derivatives by In Situ Generated Redox Couple Pd(0)/PdOx Supported on Ceria Nanorods
Source: MDPI journal article supplement (doi:10.3390/catal13010005), 2022-12-21
Supplement: s1 [file s1 › catalysts-2068526-supplementary.pdf]

## Supplementary Materials

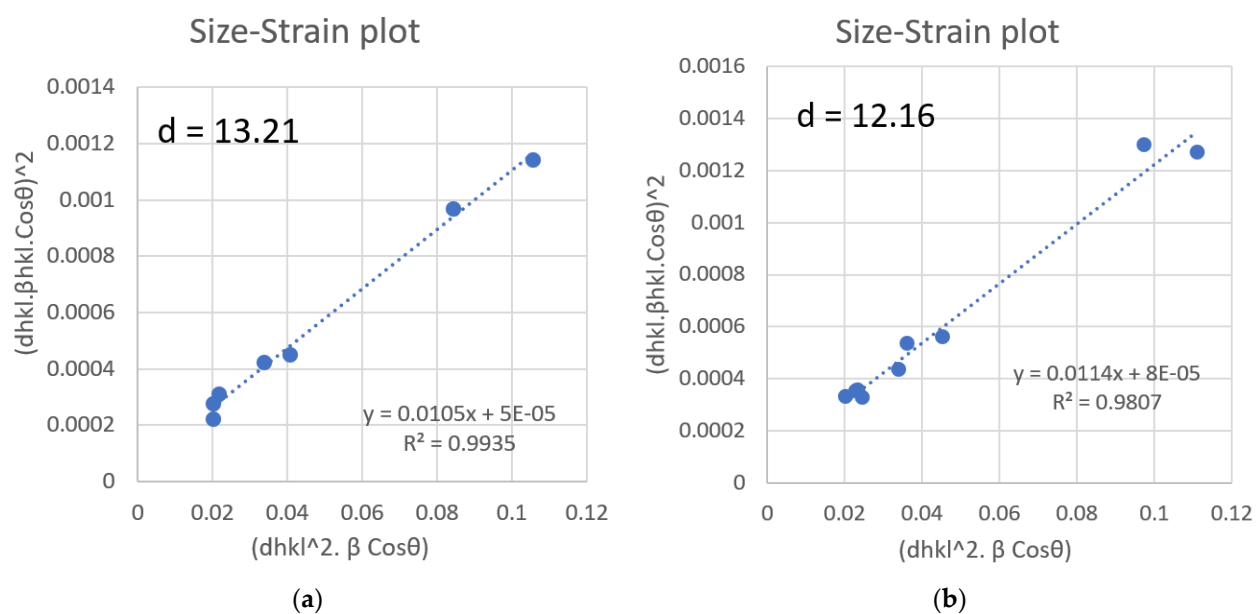

**Figure S1.** Evaluation of the average particle dimension of ceria particles by the Size-Strain Plot of XRD diffractions of: **(a)** CeO<sub>2</sub>-NR; **(b)** PdO<sub>x</sub>/CeO<sub>2</sub>-NR. Abscissa  $x = (d_{hkl})^2 \beta \cos\theta$ , ordinate  $y = (d_{hkl} \beta_{hkl} \cos\theta)^2$ .

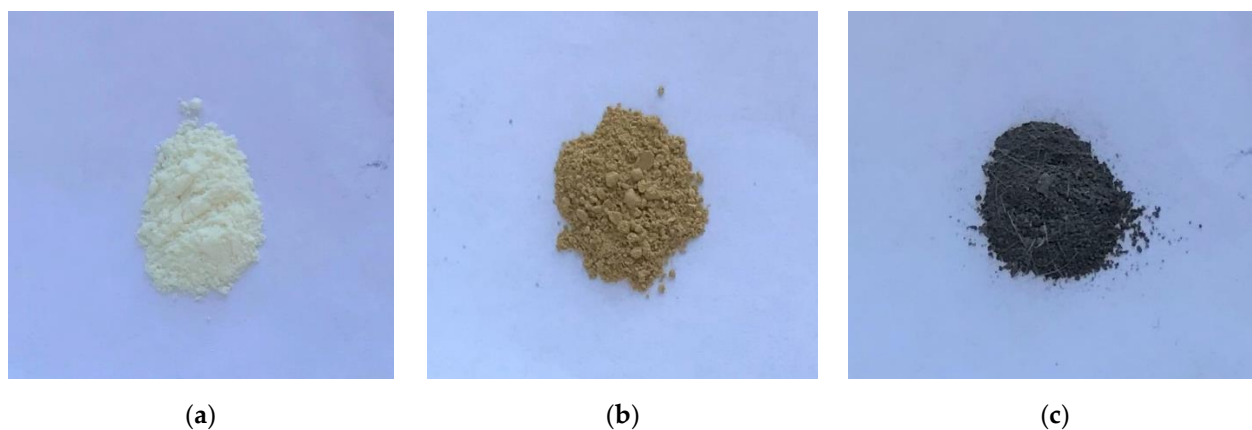

**Figure S2.** Images of (a) calcined  $\text{CeO}_2\text{-NR}$ , (b) calcined  $\text{PdO}_x/\text{CeO}_2\text{-NR}$ , (c) used  $\text{PdO}_x/\text{CeO}_2\text{-NR}$ .

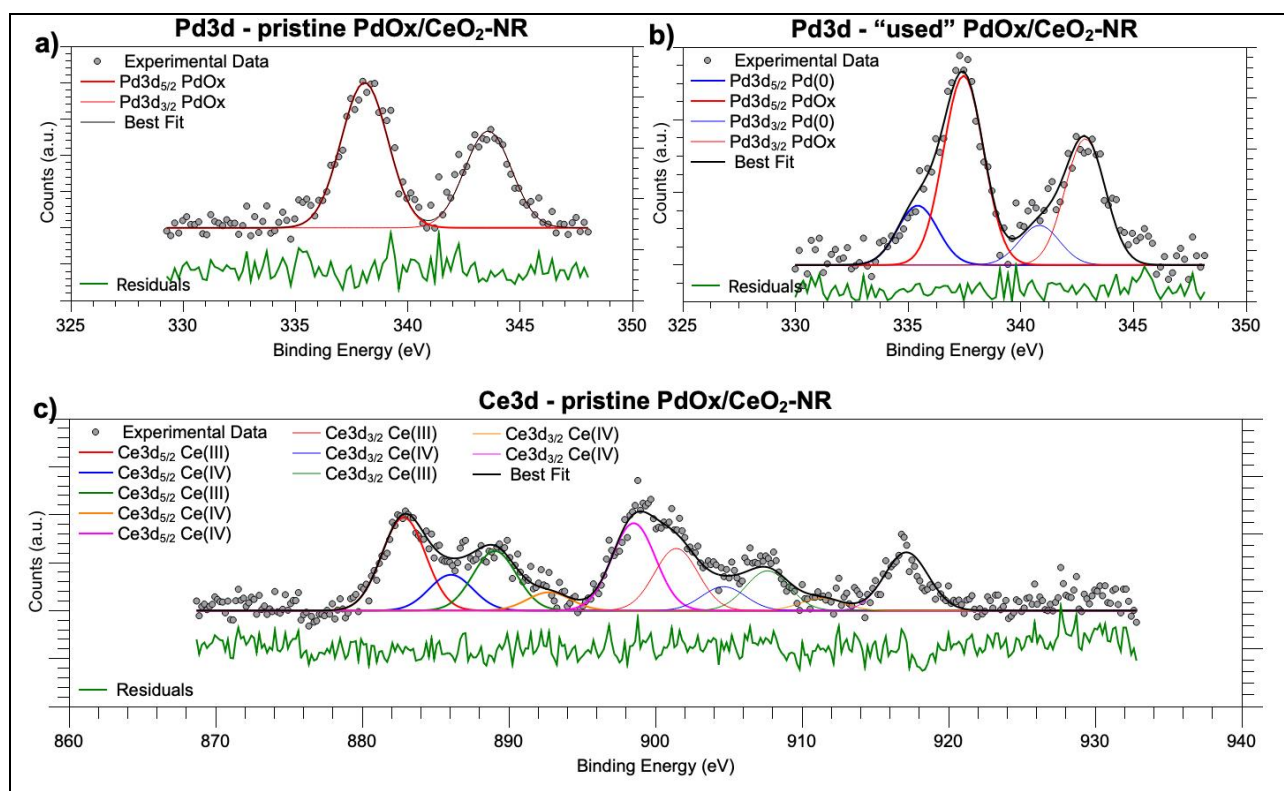

**Figure S3.** XPS spectra, with Peak Fitting Residuals (green curve), of pristine  $\text{PdO}_x/\text{CeO}_2\text{-NR}$  (a) Pd3d and (c) Ce3d core levels, and (b) for the "used"  $\text{PdO}_x/\text{CeO}_2\text{-NR}$  Pd3d core level.
